## Prospective evaluation of a hybrid clinical and electrocardiographic algorithm to predict the origin of outflow tract PVCs. A prospective multicenter study

Carreno Lineros JM.<sup>1</sup>; Penela D.<sup>1</sup>; Jauregui B.<sup>1</sup>; Soto-Iglesias D.<sup>1</sup>; Fernandez-Armenta J.<sup>2</sup>; Acosta J.<sup>3</sup>; Bisbal F.<sup>4</sup>; Ordonez A.<sup>1</sup>; Chauca A.<sup>1</sup>; Scherer C.<sup>1</sup>; Berruezo A.<sup>1</sup>

<sup>1</sup>Teknon Medical Centre, Barcelona, Spain

<sup>2</sup>University Hospital Puerta del Mar, Cadiz, Spain

<sup>3</sup>University Hospital Virgen del Rocío, Sevilla, Spain

<sup>4</sup>Germans Trias i Pujol University Hospital, Barcelona, Spain

**Funding Acknowledgements:** Type of funding sources: Public Institution(s). Main funding source(s): Beca de la Asociación del Ritmo Cardíaco para Formación en Investigación Post-Residencia en centros españoles.

**Background:** To predict the premature ventricular complex (PVC) site of origin (SOO) before the ablation procedure has important implications. 12 lead ECG information as well clinical characteristics are related with the PVC-SOO, but there is no prospective data validation.

**Purpose:** This prospective multicenter study sought to analyze the applicability and accuracy of a simple hybrid algorithm that includes electrocardiographic and clinical information in a consecutive patient population with outflow tract (OT) PVCs undergoing catheter ablation.

**Methods:** Consecutive patients with frequent OT-PVCs and indication for catheter ablation were prospectively included in 4 centers. The vascular access (femoral vein vs femoral artery) and the first outflow tract to be mapped were decided based on a two-steps hybrid algorithm (see Figure 1) including ECG information [R/S PVC precordial transition (PT): early PT if it occurs before V3; late PT if beyond V3] and clinical information [the following variables compute 1 point in a clinical score: age (>59 y.o); presence of hypertension; and gender (man)].

**Results:** 115 consecutive patients [42 (37%) man, 52 + 15 y.o] were included. Mean PVC burden at baseline was 20 ± 13% and mean LVEF was 59 ± 8%. Mean procedure time was 55 ± 26 min. Complete acute abolition of the PVC was achieved in 110 (96%) patients. 84 (73%) patients had the PVC's SOO in the right ventricle OT (RVOT) whereas 31 (27%) in the left ventricular OT (LVOT). Compared with patients with a RVOT-SOO, those with a LVOT-SOO were more frequently man [18 (58%) vs 24 (29%), p = 0.004], more frequently suffered from hypertension [18 (58%) vs 15 (18%), p < 0.001] and had an early R/S PVC transition [17 (55%) early PT, 3 (10%) late PT] in the case of LVOT-SOO vs 4 (5%) early PT, 55 (65%) late PT in the case of RVOT-SOO, p < 0.001]. The hybrid algorithm accurately anticipated the PVC's SOO in 101 (88%) patients. A reduction of at least 80% of PVC burden was achieved by 90% of patients at 6 months.

**Conclusions:** The hybrid algorithm, prospectively evaluated in an international multicenter study, has proved to permit to accurately anticipate the PVC's SOO (right vs left) in a consultive population of patients with OT PVCs.

Abstract Figure 1

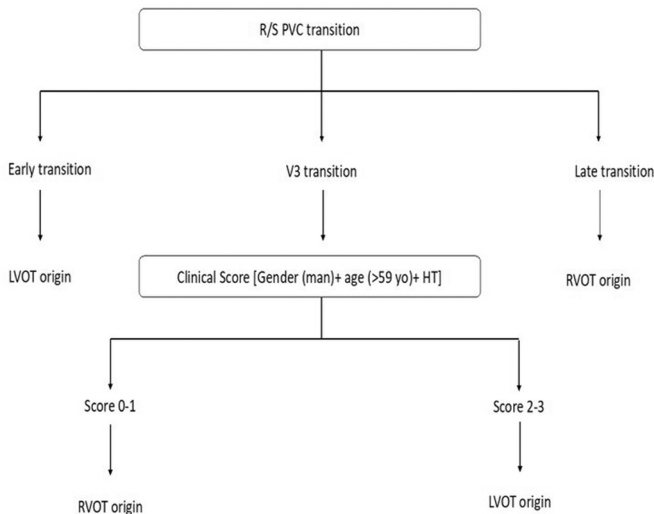

Source: http://academic.oup.com/europace/article-pdf/23/Supplement_3/euab116.354/38131851/euab116.354.pdf
